# Supplementary material
Source: HighWire-hosted journal article supplement (https://erj.ersjournals.com/content/52/2/1800230)
Supplement: inline-supplementary-material-2 [file inline-supplementary-material-2.pdf]

**Supplementary Table S1.** Additional entry criteria not described within the text

---

**Description of inclusion criteria**

---

- For women of childbearing potential: agreement to remain abstinent (refrain from heterosexual intercourse) or use two adequate methods of contraception, including at least one method with a failure rate of <1% per year, during the treatment period and for at least 3 months after the final follow-up visit
  - For men: agreement to remain abstinent (refrain from heterosexual intercourse) or use contraceptive measures and agreement to refrain from donating sperm
- 

**Description of exclusion criteria**

---

- Clinical evidence of active infection
  - Any condition that is likely to result in death in the 12 months after the start of screening
  - Lung transplantation anticipated or any planned significant surgical intervention
  - Known hypersensitivity to the active substance or any excipient of either pirfenidone or nintedanib
  - Hepatic impairment and/or severe renal impairment
  - History of GI tract perforation, unstable or deteriorating cardiac or pulmonary disease (other than IPF), long QT syndrome, alcohol or substance abuse, use of any tobacco product, etc
  - Bleeding risk
  - Pregnancy or lactation
- 

GI, gastrointestinal; IPF, idiopathic pulmonary fibrosis; QT interval, time between Q and T waves.
