# Supplementary material
Source: HighWire-hosted journal article supplement (https://erj.ersjournals.com/content/52/2/1800230)

a)

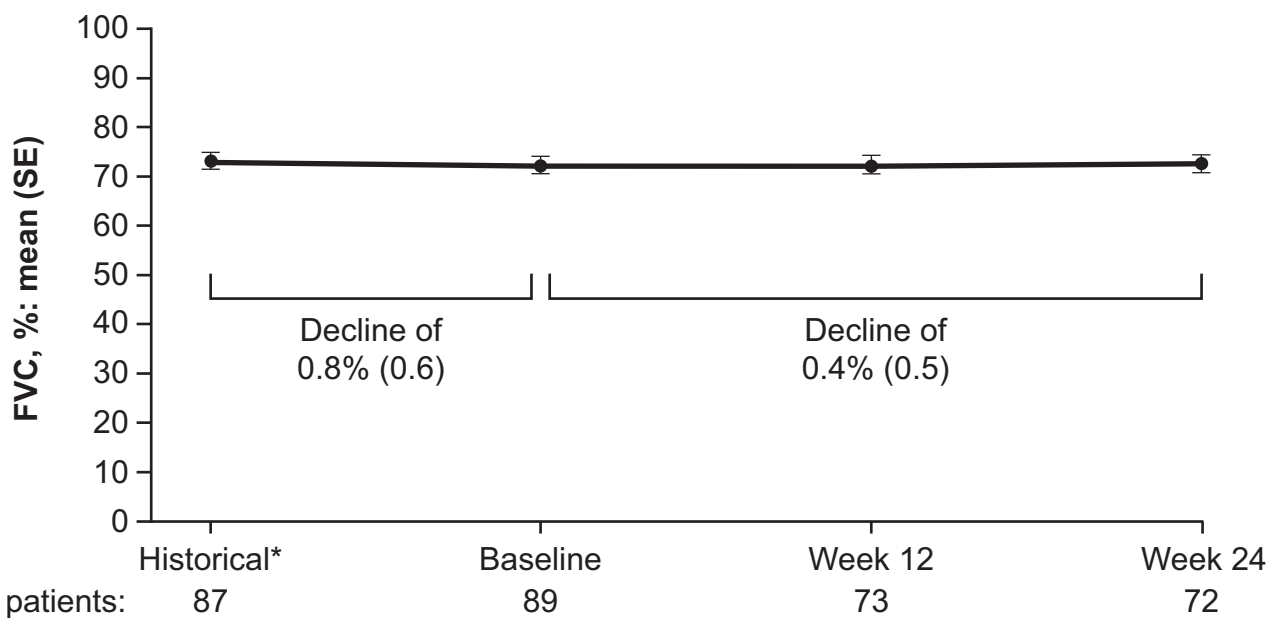

b)

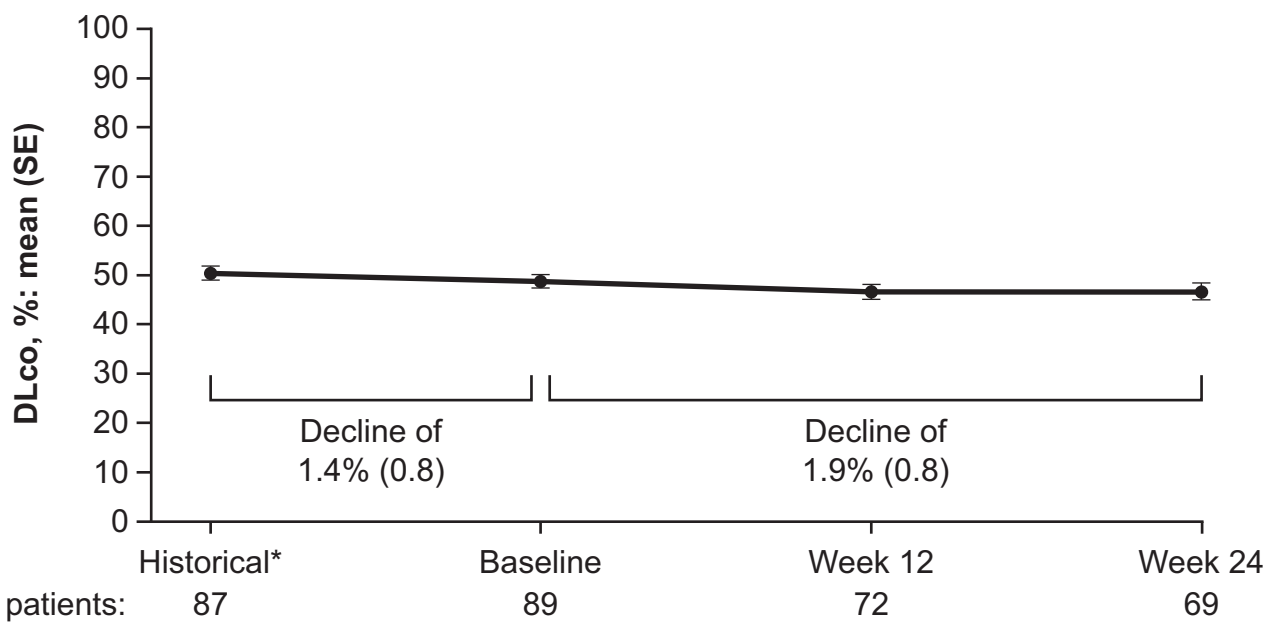

Supplement: inline-supplementary-material-5 [file inline-supplementary-material-5.pdf]
